# Supplementary material
Source: bioRxiv or medRxiv preprint supplement (https://www.biorxiv.org/highwire/filestream/28039/field_highwire_adjunct_files/0/062679-1.pdf)
Supplement: Supplementary file [file 062679-1.pdf]

1 **Supplementary information**

2

3 **AFF-1 fusogen can rejuvenate the regenerative potential of adult**

4 **dendritic trees via self-fusion**

5

6 Veronika Kravtsov<sup>1,#</sup>, Meital Oren-Suissa<sup>1,2,#</sup>, and Benjamin Podbilewicz<sup>1†</sup>

7

8 <sup>1</sup>Department of Biology, Technion- Israel Institute of Technology, Haifa 32000, Israel

9 <sup>#</sup>These authors contributed equally to this work

10 <sup>†</sup>Correspondence to: [podbilew@technion.ac.il](mailto:podbilew@technion.ac.il)

11 Additional footnotes:

12 <sup>2</sup>Present address: Columbia University Medical Center, Department of Biochemistry &

13 Molecular Biophysics, New York, 10032, USA

14

15

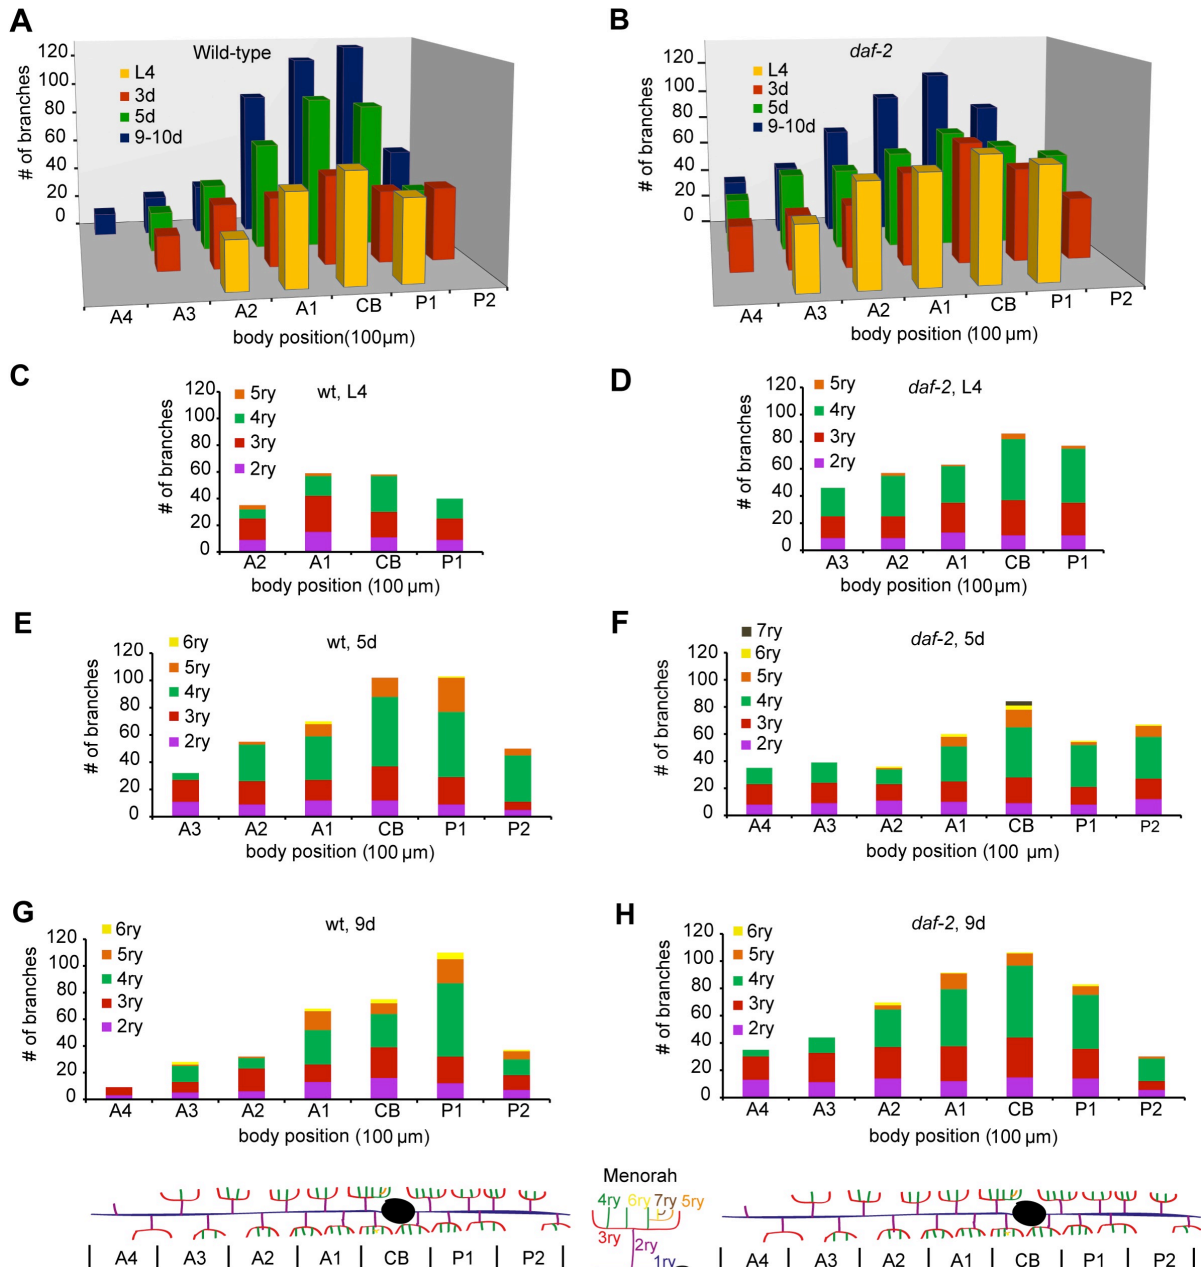

17

18

### 19 Fig S1. Anterior-posterior branching gradient sharpens as animals age

20 (A-B) Average number of branches per 100 μm of body length (A4-P2; A, anterior; P,  
 21 posterior; CB, cell body; d, days of adulthood) in wild-type (wt) and *daf-2* mutants. Gradient  
 22 sharpening is delayed in *daf-2*. We performed three way analysis of variance (ANOVA) to  
 23 compare between wt (A) and *daf-2* (B). The contribution of body position and age to  
 24 branching were significant ( $p=0.0001$  and  $p=1.4 \times 10^{-6}$ , respectively). Age\*genotype, body  
 25 position\*genotype, body position\*age and genotype alone were significant ( $p=0.007$ ,  
 26  $p=0.001$ ,  $p=0.043$  and  $p=0.023$ , respectively). Number of animals: wt  $n \geq 2$ ; *daf-2*  $n \geq 3$ .

27 (C-H) Each bar is a 100 μm long PVD region. Bars and schematic menorahs on the bottom:  
 28 2ry, magenta; 3ry, red; 4ry, green; 5ry, orange; 6ry, yellow; 7ry, brown.

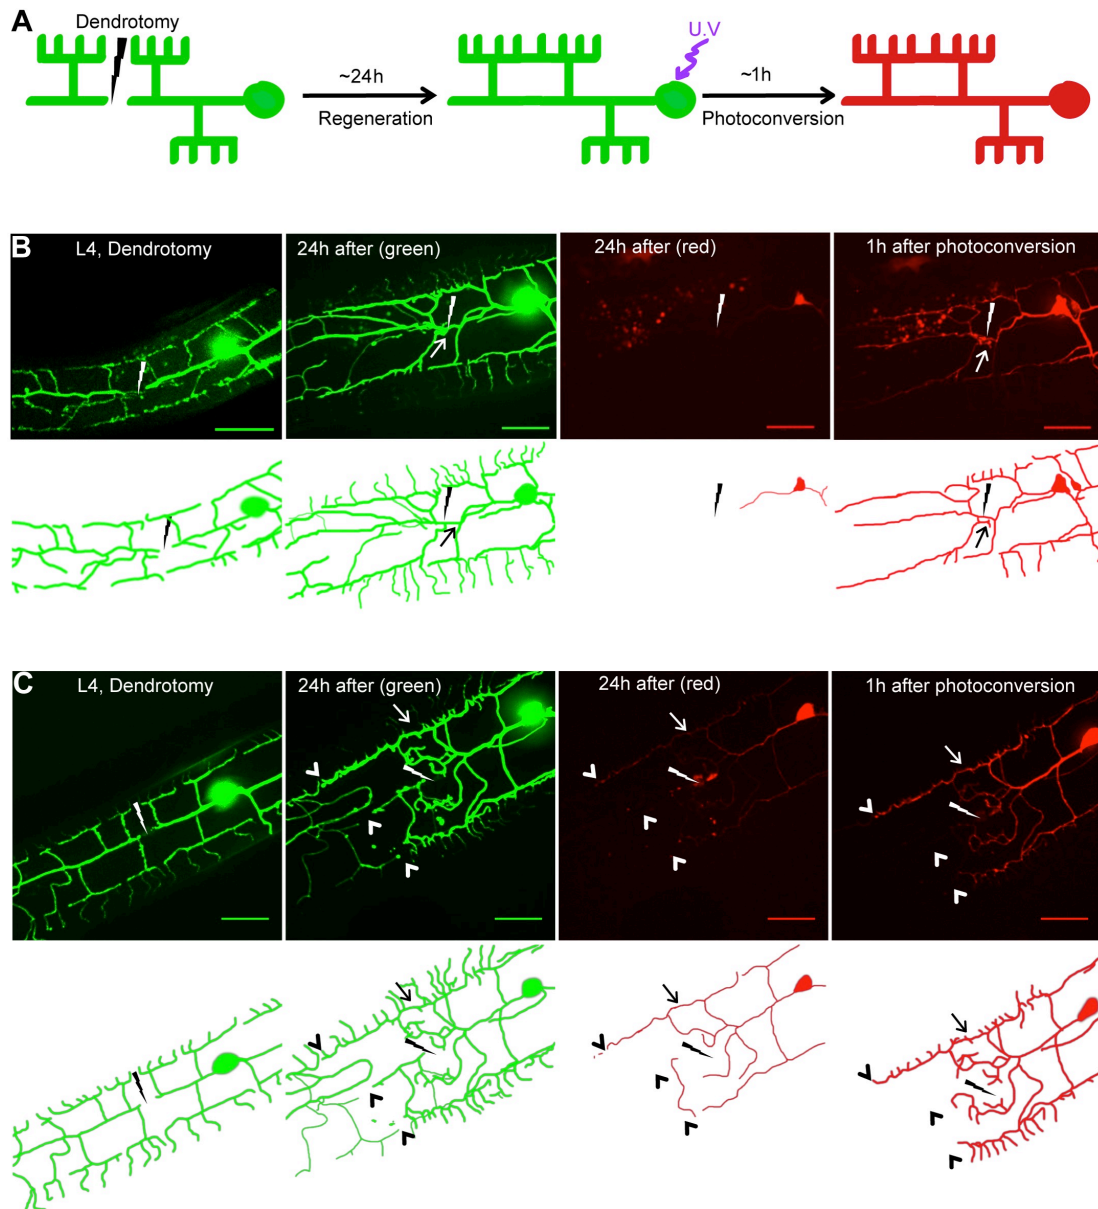

29  
30

31 **Fig S2. Fusion is a crucial step in regeneration of injured dendrites**

32 **(A)** Scheme describing the fusion assay using a photoconvertible fluorescent marker Kaede.  
33 Primary dendrite is injured using a laser, then the animal is recovered and imaged again after  
34 ~24 hours in green and red channels. Green Kaede is photoconverted using a U.V. laser  
35 focused to the cell body. After ~1 hour the spread of red Kaede is observed again.

36 **(B)** Upper panel: confocal reconstructions of wild-type L4 animal immediately after  
37 dendrotomy, green fluorescence 24 hours after injury and before photoconversion, red  
38 fluorescence before photoconversion and red fluorescence an hour after photoconversion of  
39 the cell-body. In the lower panel are illustrations. Red kaede passed into the distal area,  
40 meaning that the broken dendrite fused to the proximal part.

41 **(C)** A negative control showing L4 wild-type animal in which the primary branch did not  
42 regenerate within 24 hours. Proximal candelabra are fused (arrows), but it did not bridge the  
43 gap between the distal and proximal stumps (arrowheads). Indeed red kaede did not spread  
44 into the detached distal stump. The order of images is the same as described in **(B)**.  
45 Lightings point at injury sites, arrows point at fusion sites. Scale bars, 20  $\mu$ m.

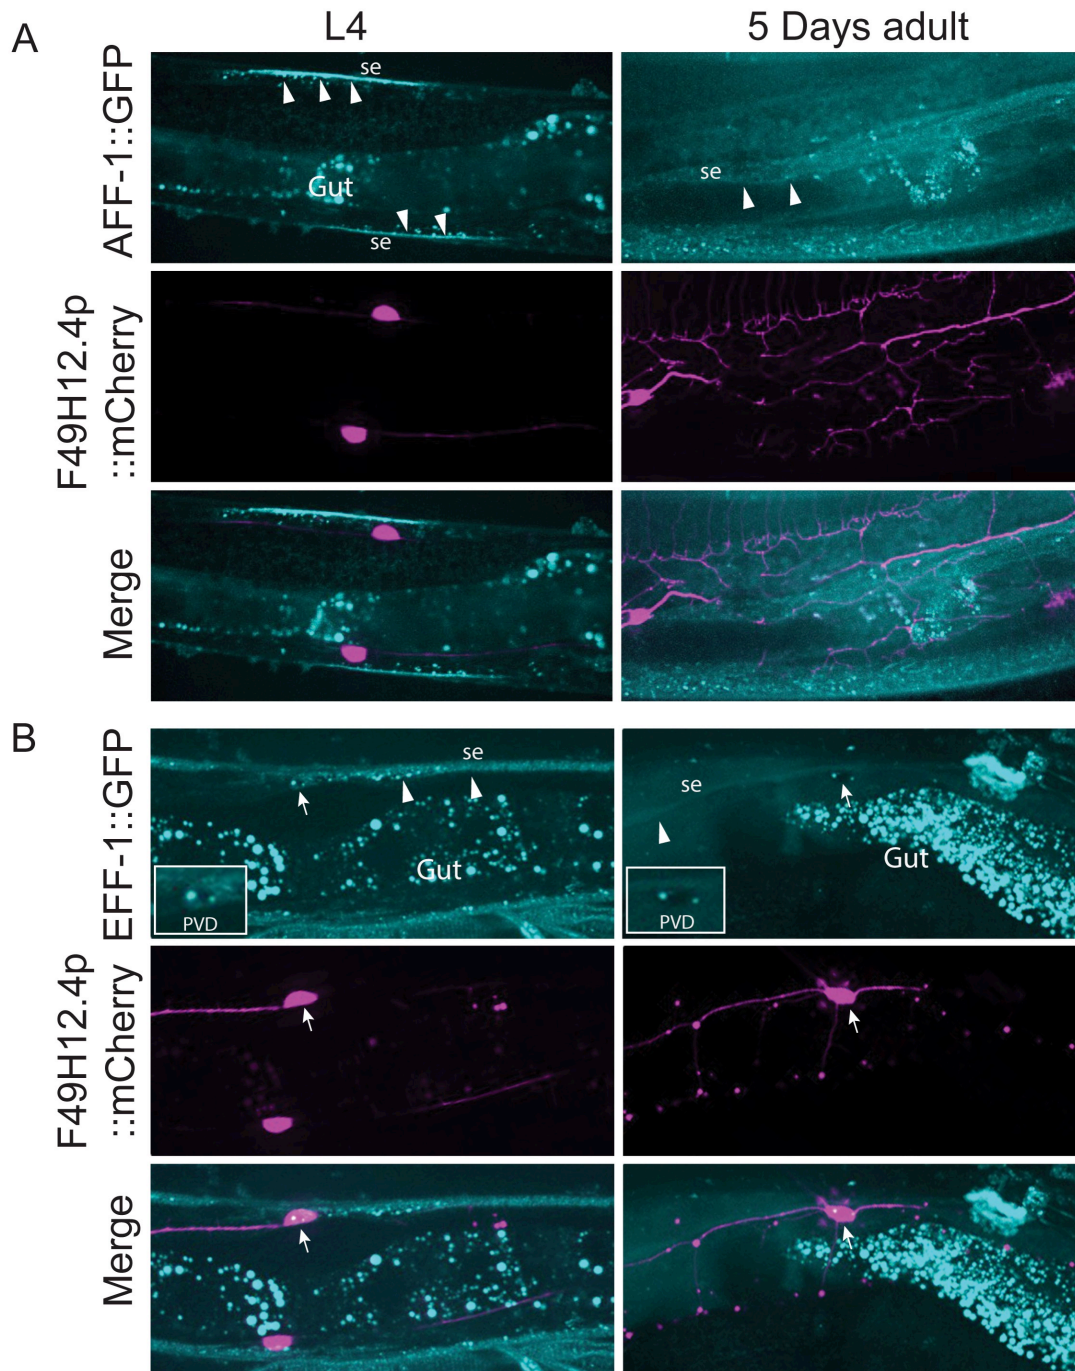

46

47

48 **Fig S3. AFF-1 and EFF-1 expression pattern in L4 and aging worms**

49 **(A)** A 30kb fosmid-based reporter for AFF-1 shows expression in the epithelial seam-cells at  
 50 the L4 stage (marked with arrowheads), and in 5-day adults. AFF-1 is not expressed at the  
 51 PVD in any stage. Multiple transgenic lines were analyzed and a similar expression pattern  
 52 was observed in all.

53 **(B)** EFF-1 expression at the L4 stage and 5-days adults was analyzed using an EFF-1::GFP  
 54 translational chimera: 7.5 kb *eff-1* promoter driving the full-length *eff-1* genomic coding  
 55 sequence was fused to GFP<sup>1</sup>. EFF-1 is expressed in the seam-cells (arrowheads) and the  
 56 PVD cell body (arrows and inset) in vesicles. Expression persists after 5 days.

57

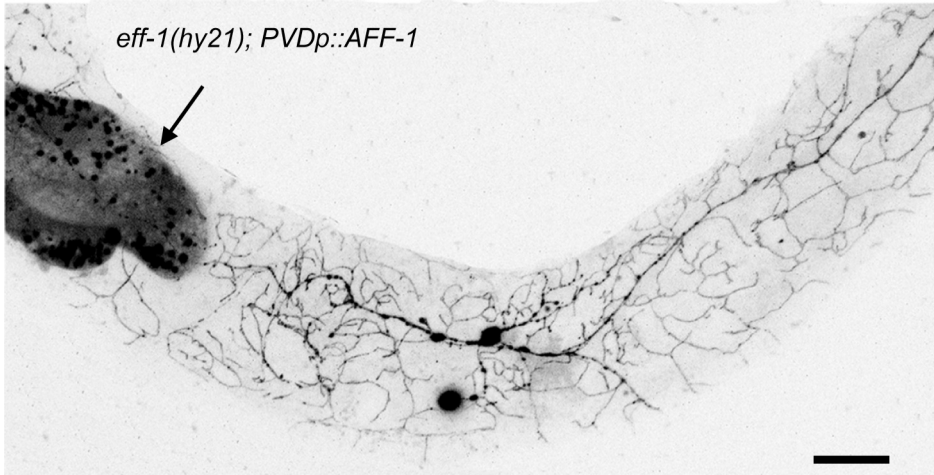

58

59

60 **Fig S4. AFF-1 does not retract PVD's dendrites. *eff-1(hy21)* animals expressing AFF-1**  
61 **in the PVD (PVDp::AFF-1) show excess branching, similarly to *eff-1* mutants**

62 Thus the fusogen AFF-1 cannot rescue *eff-1* loss-of-function phenotype when expressed in  
63 the PVD. Arrow points to hypodermal cells expressing GFP after ectopic PVD neurite-  
64 epidermal fusion. Scale bar, 10  $\mu$ m.

65

66

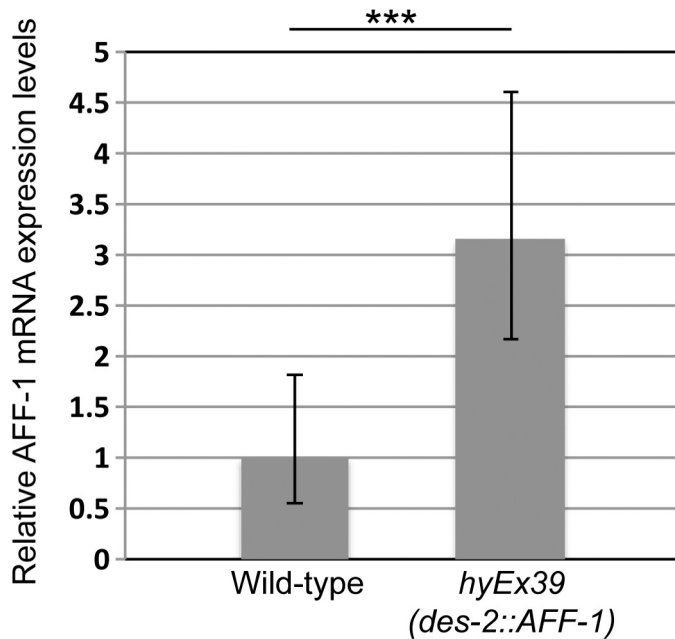

67

68 **Fig S5. Real-time RT-PCR analysis of AFF-1 mRNA expression in wild-type and transgenic**  
69 **worms over expressing AFF-1 in the PVD. Bar graph representing the fold changes of**  
70 **mRNA levels quantified by normalization to the *act-1* gene as an internal control. *p* value**  
71 **from *t* test \*\*\* $p < 0.0001$ .**

72

73

74

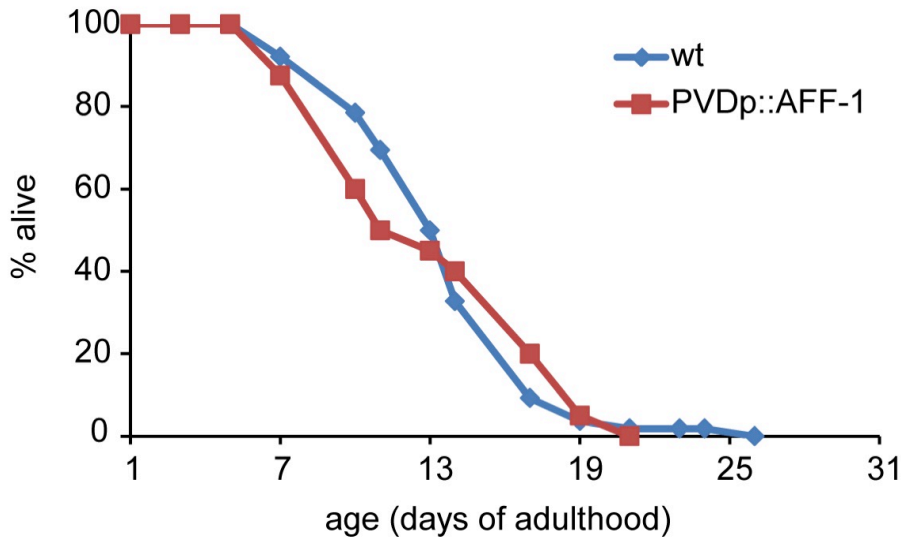

75  
76  
77  
78  
79  
80

**Fig S6. AFF-1 overexpressing animals exhibit wild-type life-span**

Life-span curve of wild-type (blue) and AFF-1 overexpression in the PVD (PVDp::AFF-1, red). Median life-span is 14 days of adulthood for wild-types and 13 for PVDp::AFF-1 containing animals.

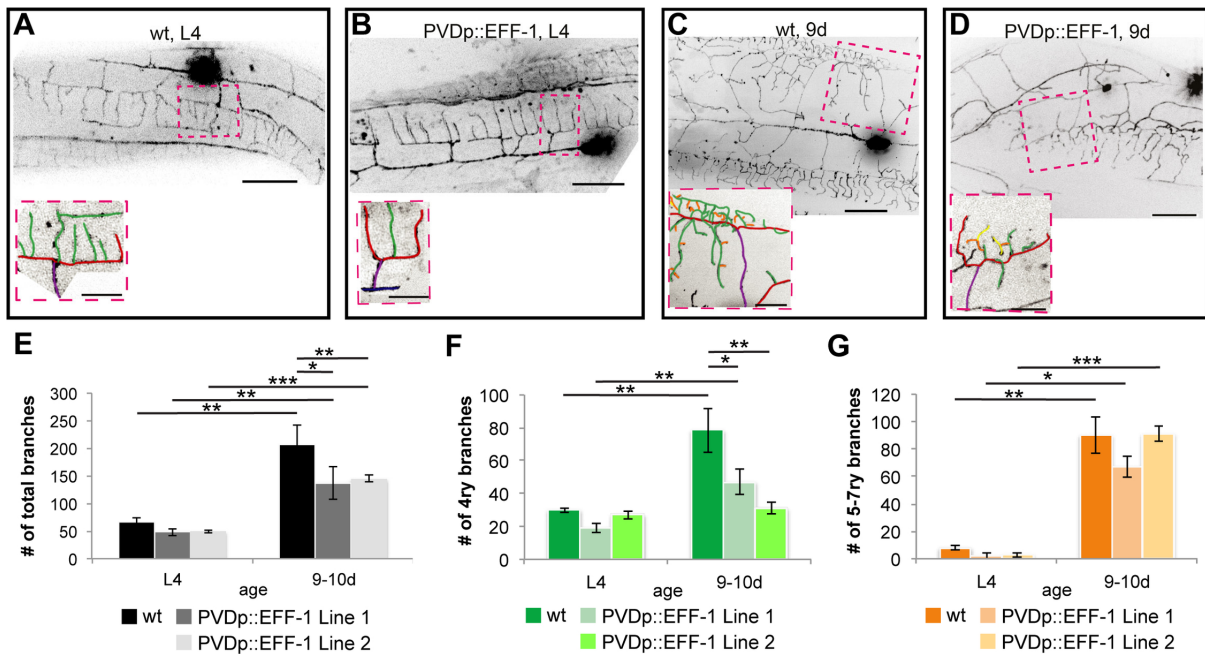

81  
82  
83  
84  
85  
86  
87  
88  
89  
90  
91  
92

**Fig S7. EFF-1 overexpression in the PVD simplifies "aged" dendritic trees**

(A-D) Inverted fluorescence images of PVD neurons.

(A and C) Represent wild-type neurons from L4 and 9 days of adulthood (9d).

(B and D) Represent EFF-1 overexpression under PVD specific promoter (PVDp) at L4 and 9d. In each panel one candelabrum unit (boxed) is enlarged and colored (see Figure 1A).

Scale bars, 20  $\mu$ m and 10  $\mu$ m in the enlarged images.

(E-G) Graphs showing number of branches in 100  $\mu$ m of length around cell body. Error bars,  $\pm$  s.e.m. According to one way ANOVA test, age is a significant factor when comparing number of branches ( $p < 0.0001$ ).  $p$  values from  $t$  tests: \*  $p < 0.05$ , \*\*  $p < 0.001$ , \*\*\*  $p < 0.0001$ . Number of animals:  $n \geq 4$ . PVDp::EFF-1 line 1 and 2 correspond to worms carrying the extrachromosomal arrays *hyEx392* and *hyEx23*, respectively.

93 **Captions for movies**

94 **Movie S1. Dendritic plasticity of aged wild-type**

95 Inverted fluorescence confocal maximum intensity projections time lapse movie of wild-type  
96 PVD marked with GFP at 5 days of adulthood. Some branches show dynamic growth and  
97 retraction (arrow). The counter in this and other movies are in Hours: minutes.

98

99 **Movie S2. Young wild-types regenerate rapidly after dendrotomy**

100 Inverted fluorescence confocal maximum intensity projections time lapse movie of two L4  
101 wild-type animals. PVD marked with Kaede. Both animals regenerated within 2 hours after  
102 laser induced dendrotomy via menorah-menorah fusion (blue arrows). Red lightnings mark  
103 the sites of injury.

104

105 **Movie S3. Kaede photoconversion confirms auto-fusion as part of regeneration**

106 Confocal time lapse movie of wild-type L4 worm expressing the photoconvertible protein  
107 Kaede in the PVD. The 1ry branch of this worm was dendrotomized 24 hours prior to the  
108 movie, then green kaede was photoconverted in the cell body, using U.V. laser (marked with  
109 purple asterisk). In the left panel the red channel is seen, with red for the photoconverted  
110 kaede protein traveling from the proximal part to the fused distal part (blue arrows). In the  
111 right panel the green channel is shown. Injury site is indicated by yellow lightning. The  
112 photoconverted red-Kaede was transferred to the distal part (top of the image) by menorah-  
113 menorah fusion and there was no 1ry-1ry fusion.

114

115 **Movie S4. Adult wild-type responds slowly to injury**

116 Inverted fluorescence confocal maximum intensity projections time lapse movie of wild-type  
117 animal at the age of 2 days of adulthood. PVD is marked by Kaede. There is neither

118 regeneration nor degeneration within the first 3 hours after cut. Red lightning points at injury  
119 site.

120

121 **Movie S5. PVDp::AFF-1 L4 regenerates similarly to wild-type**

122 Inverted fluorescence confocal maximum intensity projections time lapse movie of  
123 PVDp::AFF-1 (AFF-1 overexpression in the PVD) L4 nematode. The worm was injured and  
124 imaged immediately after. In this movie, it rapidly regenerates (within 3 hours from cut) via  
125 menorah-menorah fusion, as marked by blue arrows and by novel outgrowth that fuses to the  
126 distal primary and by that bridges the gap (yellow arrow). Red lightning points to injury site.  
127 Red arrowhead marks a candelabrum that degenerated during the movie.

128

129 **Movie S6. PVDp::AFF-1 5d old animal reconnects after cut**

130 Confocal time lapse movie of 5 days old PVDp::AFF-1 transgenic animal, beginning 5 hours  
131 post injury. Growth is seen near site of dendrotomy. The primary branch grows toward the  
132 distal primary and reconnects with it 10 hours after injury (blue arrows). After this time point  
133 the worm was recovered and imaged 15 hours later (25 hours after cut), where regeneration  
134 via novel outgrowth from 1ry to distal fragment of 1ry branch fusion and menorah-menorah  
135 fusion is indicated by blue arrows. Red lightning points at injury site.

136

137 **References**

138

139 1 Mohler, W. A. *et al.* The type I membrane protein EFF-1 is essential for  
140 developmental cell fusion in *C. elegans*. *Dev Cell* **2**, 355-362 (2002).

141
